# Supplementary material for: Long-term Transplant Effects of iPSC-RPE Monolayer in Immunodeficient RCS Rats
Source: Preprints.org preprint supplement (doi:10.20944/preprints202109.0340.v1), 2021-09-20
Supplement: Supplementary file 1 [file supplementary]

**
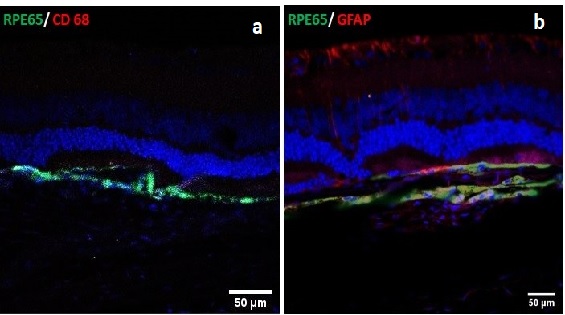
**

**Supplementary Figure1**. Representative images of immunodeficient RCS rat retinas implanted with iPSC-RPE monolayer (shown by RPE65 expression) cultured on a parylene membrane assessed at 1-month post implantation. Additional labelling of the retina sections was performed for expression of (a) CD68 (macrophages/ microglia) and (b) GFAP (glial cells).


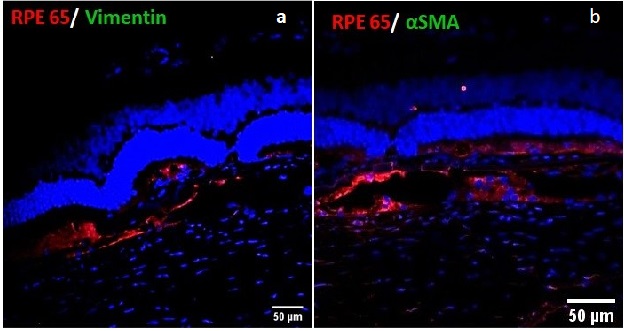


**Supplementary Figure2.** Representative images of immunodeficient RCS rat retinas implanted with iPSC-RPE monolayer (shown by RPE65 expression) cultured on a parylene membrane assessed at 1-month post implantation. Additional labelling of the retina sections was performed for expression of classical mesenchymal markers(a) vimentin and (b) α smooth muscle actin (α SMA).
